# Supplementary material
Source: PubMed Central journal article supplement (PMC7783777)
Supplement: NIHMS1656509-supplement-SI.pdf [file NIHMS1656509-supplement-SI.pdf]

## Supporting Information

### **Electron Redistribution within the Nitrogenase Active Site FeMo-cofactor During Reductive Elimination of H<sub>2</sub> to Achieve N≡N Triple-Bond Activation**

Dmitriy A. Lukoyanov, Zhi-Yong Yang, Dennis R. Dean,  
Lance C. Seefeldt, Simone Raugei, Brian M. Hoffman

## EPR Linebroadening

As the first probe of the  $^{95}\text{Mo}$  hyperfine coupling in the two-electron reduced cofactor of  $\text{E}_4(2\text{H})^*$ , we looked for EPR line-broadening in  $^{95}\text{Mo}$  enriched samples, as observed for  $\text{E}_4(4\text{H})$ . The weak  $^{95}\text{Mo}$  coupling in the  $\text{E}_4(4\text{H})$  state causes a slight broadening of the X-band EPR spectrum (**Fig S1**), while the clearest evidence of the  $^{95}\text{Mo}$  broadening in  $\text{E}_4(4\text{H})$  is that enrichment obscures  $g_3$  features generated by strong hyperfine interaction with the two bridging hydrides (**Fig S1**). EPR simulations confirm that this effect is produced by the small  $^{95}\text{Mo}$  hyperfine coupling measured in the ENDOR experiment. The loss of the hydrides in  $\text{E}_4(2\text{H})^*$  eliminates the hydride hyperfine features at  $g_3$ , and thus this indicator of  $^{95}\text{Mo}$  hyperfine broadening. However, but nonetheless, comparison between natural-abundance and  $^{95}\text{Mo}$ -enriched enzyme shows that the spectrum of  $\text{E}_4(2\text{H})^*$  does not exhibit noticeable broadening upon the  $^{95}\text{Mo}$  enrichment (**Fig S1**), demonstrating that any coupling must be small: there is no appreciable increase in the  $^{95}\text{Mo}$  coupling in the two-electron reduced state  $\text{E}_4(2\text{H})^*$ .

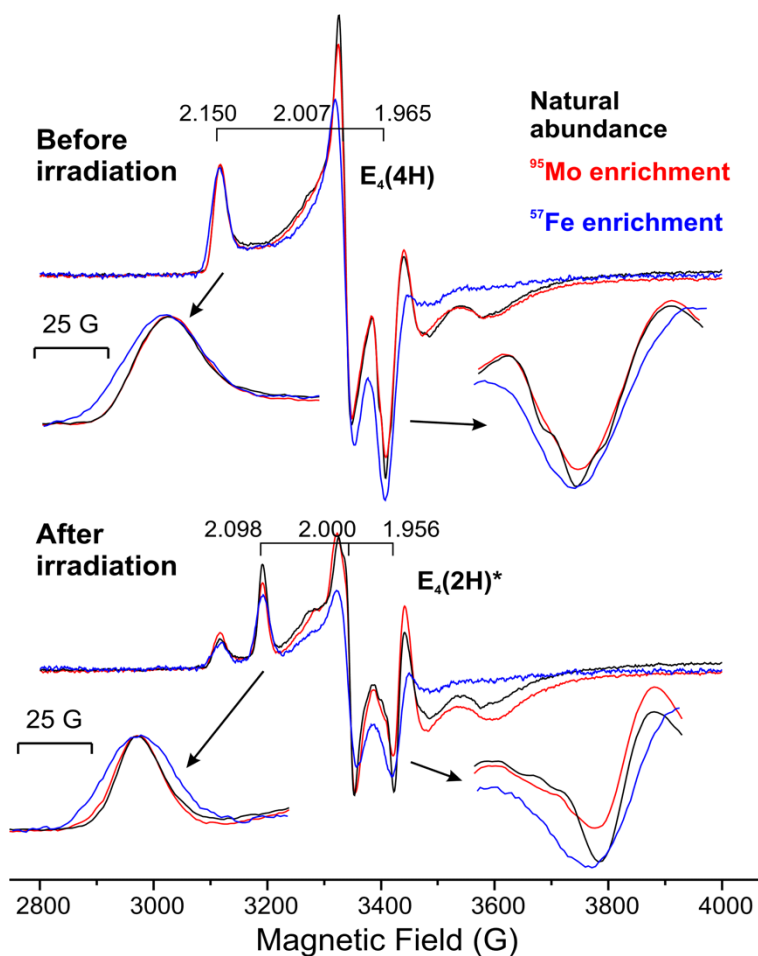

**Figure S1.** X-band EPR spectra of the natural abundance,  $^{95}\text{Mo}$  and  $^{57}\text{Fe}$  enriched V70I trapped during turnover under Ar taken before (top) and after (low) irradiation with 450 nm laser diode at 12 K. EPR conditions: microwave frequency, 9.36 GHz; temperature, 12 K; microwave power 10 mW; modulation amplitude, 2 G; time constant, 160 ms; scan time, 2 min; 4 scans accumulation.

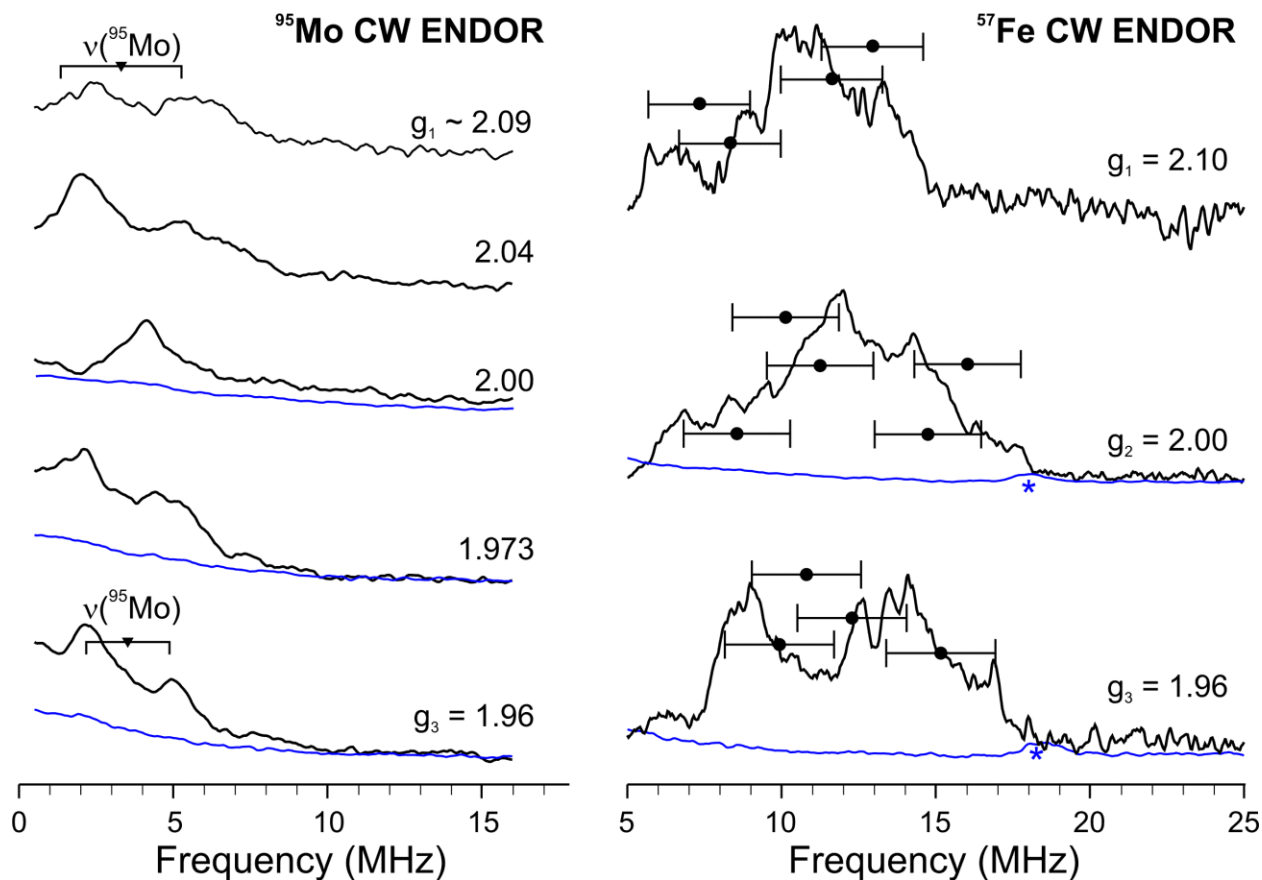

**Figure S2.** 35 GHz CW ENDOR  $^{95}\text{Mo}$  and  $^{57}\text{Fe}$  signals for  $\text{E}_4(2\text{H})^*$  state prepared with  $^{95}\text{Mo}$  (left) and  $^{57}\text{Fe}$  (right) enriched MoFe proteins. Meanings of the 'goalposts' for  $^{95}\text{Mo}$  and  $^{57}\text{Fe}$  signals are explained in legends of **Fig 4** and **Fig 5** correspondingly. Blue lines represent spectra obtained for natural abundance sample and compared with spectra of isotopically enriched samples by normalization to the same  $\text{E}_4(2\text{H})^*$  EPR signal intensity; (\*) at  $\sim 18$  MHz denotes intensity associated with 3rd harmonics of the matrix  $^1\text{H}$  signal. *Conditions:*  $T = 2$  K; microwave frequency, 34.8 GHz ( $^{95}\text{Mo}$  and natural abundance samples) and 35.1 GHz ( $^{57}\text{Fe}$  sample); microwave power, 0.1  $\mu\text{W}$  and 0.04  $\mu\text{W}$ ; modulation amplitude, 1 G and 4 G; RF sweep speed, 2 MHz/s and 1 MHz/s; time constant, 64 ms; RF bandwidth-broaden to 100 kHz.

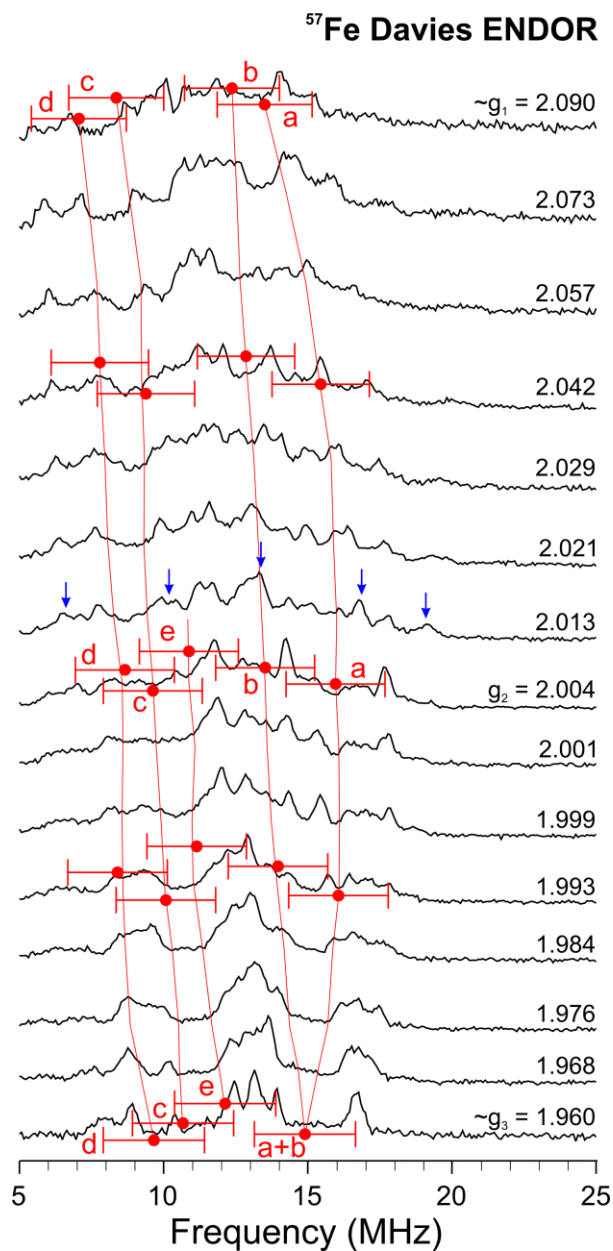

**Figure S3.** Field dependence of <sup>57</sup>Fe random-hop Davies ENDOR collected for <sup>57</sup>Fe enriched V70I Ar turnover after irradiation of E<sub>4</sub>(4H) with 450 nm laser diode at 12 K to generate E<sub>4</sub>(2H)\*. Red 'goalposts' indicate response from one E<sub>4</sub>(2H)\* <sup>57</sup>Fe centered at half of its hyperfine coupling and split by 2ν(<sup>57</sup>Fe). Arrows indicate signals originating from <sup>57</sup>Fe of E<sub>4</sub>(4H) that is present in the sample due to incomplete photolysis. Red lines that connect E<sub>4</sub>(2H)\* <sup>57</sup>Fe hyperfine doublets at magnetic fields across the EPR envelope, are drawn with consideration of peaks known to arise from the E<sub>4</sub>(4H) residual background.<sup>12</sup> Because some signals split as the field changes, or broaden into near-undetectability at some fields, then narrow again and reappear, these correspondences of signals across the EPR envelope are overall successful, but nevertheless do not support attempts to obtain hyperfine tensors to high precision. *ENDOR conditions: microwave frequency, 34.90 GHz; temperature, 2 K; t(π/2) = 40 ns, τ = 600 ns; T<sub>RF</sub> = 35 μs; repetition time, 25 ms; 200-400 scans.*

## DFT Model adopted in the QM/MM molecular dynamics simulation

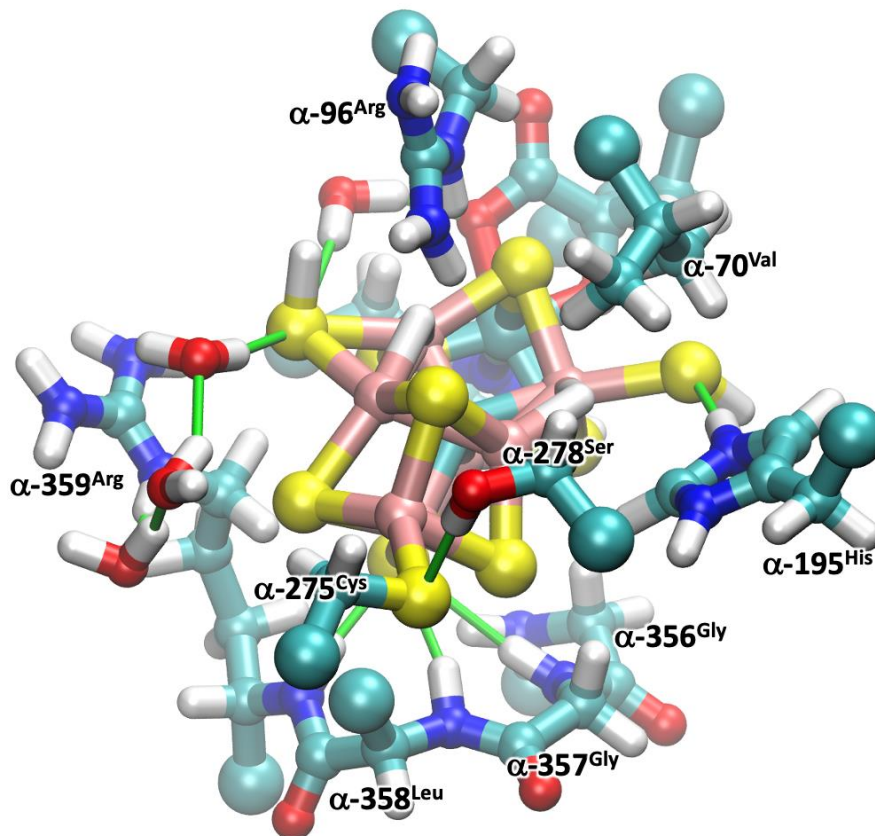

**Figure S4.** Ball and stick representation of the cofactor and protein environment treated at DFT level in the metadynamics QM/MM simulation. Protein residues and ligands are labelled except  $\alpha$ -442<sup>His</sup> and homocitrate which are located on the back of the cofactor. Fe atoms are shown in rust, S atoms in yellow, C atoms in cyan, O atoms in red, N atoms in blue, and H atoms in light gray. Relevant H-bonds are shown as thin green sticks. The C atoms in the molecular mechanics part of the system linked to the QM atoms are shown as large spheres.

### Coordination Numbers as Order Parameters to Follow the Hydrogen Reorganization

We have performed metadynamics simulations to explore the hydride reorganization on the Fe<sub>2,3,6,7</sub> face. Metadynamics is an adaptive biasing potential technique, which disfavors configurations that have been already explored, and consequently favors situations that would have been poorly explored thermally. The bias can be applied to any physical quantity describing the process being studied. The history-dependent potential is constructed as a sum of Gaussians centered on each value of the collective variable previously explored. The potential fills the minima of the free energy surface in time, and as the simulation proceeds, its sum converges to the free energy landscape as a function of the collective variables. In the present case, we chose the coordination numbers Fe-to-H described in the text.

Coordination numbers are very useful order parameters to study chemical processes with biased molecular dynamics simulations. In the present study, we used the coordination numbers to identify the location of the two hydridic hydrogen atoms on the Fe<sub>2</sub>/Fe<sub>3</sub>/Fe<sub>6</sub>/Fe<sub>7</sub> face of FeMo-co and characterize the type of E<sub>4</sub> isomer that a given arrangement of hydrogen atoms gives rise.

Specifically, we adopted coordination numbers that quantify and characterize the number of hydrogen atoms coordinated to each Fe atom of the Fe<sub>2</sub>/Fe<sub>6</sub> and Fe<sub>3</sub>/Fe<sub>7</sub> either pairs.

A coordination number can be defined using different functional forms. However, all definitions rely on a distance cutoff,  $r_0$ . The following definition of coordination number was adopted:

$$n = \frac{1}{2} \sum_k n'(r_k) \tag{S1}$$

With

$$n'_k(r) = \frac{1 - \left(\frac{r_k}{r_0}\right)^6}{1 - \left(\frac{r_k}{r_0}\right)^{12}}$$

where  $r_k$  is the distance between a given Fe-H pair and the summation runs over all of the possible Fe-H distances. For instance, for the coordination number  $n(\text{Fe}_2/\text{Fe}_6)$  the sum runs over  $k = \text{Fe}_2\text{-H}_1, \text{Fe}_2\text{-H}_2, \text{Fe}_6\text{-H}_1, \text{and Fe}_6\text{-H}_1$ . A value of the cutoff distance  $r_0 = 1.85 \text{ \AA}$  was used, which yields the  $n'(r)$  reported in Figure S4. For this choice of  $r_0$ , we are able to distinguish between different E<sub>4</sub> isomers. For example,  $n(\text{Fe}_2/\text{Fe}_6)$  assumes the value of about 1.4, 2.1 and 2.6 for E<sub>4</sub>(2H;H<sub>2</sub>), E<sub>4</sub>(4H)<sup>(b)</sup> and E<sub>4</sub>(4H)<sup>(c)</sup>.

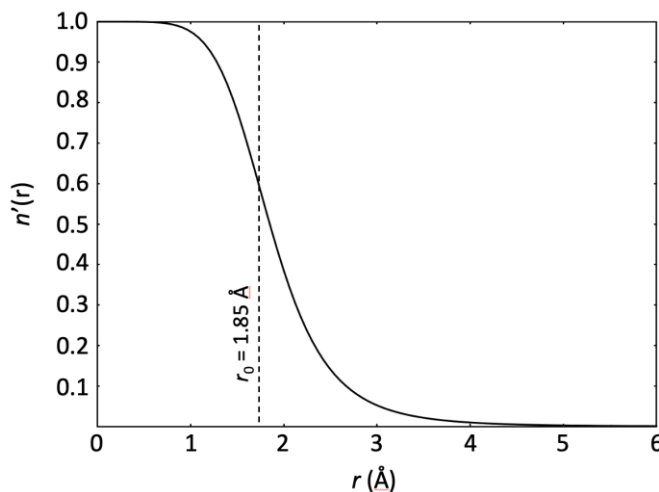

**Figure S5.** Graphical representation of the function  $n'(r)$  for  $r_0 = 1.85 \text{ \AA}$ .

### Natural Bond Orbital Analysis of the Electron Density

The mechanistic model put forward in the main text requires that as H<sub>2</sub> is formed and released via reductive elimination, two electrons are first stored in and then depart with the H<sub>2</sub> molecule. This process leaves two electrons on the FeMo-co, likely on the Fe center and not on the Mo center.

The electronic redistribution that follows the H atoms reorganization should be in principle quantifiable by DFT analysis. However, the reorganization of electrons highlighted above cannot be appreciated from a simple analysis of the charge of each individual Fe center obtained by traditional partitioning schemes, such Mulliken population analysis. As can be seen from **Table**

**S1**, the Mulliken charges on the metal centers atoms do not change with the location of the hydrogen atoms and they are all close to  $+0.5e$  (with variations within  $0.4 e$ ).

To obtain quantitative information on the charge redistribution, we performed a natural bond orbital (NBO) analysis. The NBO theory was originally developed to study hybridization and covalency in molecules in terms of concepts similar to Lewis chemical structures. Then it was extended to the analysis of intermolecular charge transfer due to localized orbital interactions. The NBO,  $\phi$ , associated to a bond between two atoms A and B is formed by a linear combination of two orthonormal hybrid orbitals,  $h_A$  and  $h_B$ , defined in terms of atomic orbitals centered on A and B:

$$\phi(\text{A-B}) = c_A h_A + c_B h_B$$

where  $|c_A|^2 + |c_B|^2 = 1$ . The relative magnitude of the coefficients  $c_A$  and  $c_B$  can be taken as a measure of the bond polarization due to the different electronegativity of A and B. For a perfectly apolar bond  $c_A = c_B = 2^{-1/2} \approx 0.707$ . Non-bonded orbitals, such as lone pairs or localized  $d$ -orbitals, are given by only one hybrid (i.e.,  $c_A = 1$  and  $c_B = 0$ ). In principle, from the occupancy of a given NBO  $\phi$  and the coefficients  $c$  of the linear combination that defines  $\phi$  one can obtain the total fractional charge on a given atomic center. However, as for the Mulliken analysis, charges obtained in this way are not informative as they are all close to  $+1e$  (with variations within  $0.15 e$ ; see **Table S2**). Instead, the analysis of non-bonded orbitals localized on the Fe atoms ( $3d$  and  $4s$  orbitals) provides values which can clearly discriminate among different H atoms arrangements. We consider non-bonded electrons those electrons that either belong to orbitals classified as non-bonded according to the NBO analysis (“lone pairs”), or that are in highly polarized  $\sigma$ □, or that  $c_{\text{Fe}}h_{\text{Fe}} + c_Xh_X$  for which  $|c_{\text{Fe}}|^2 > 0.9$ . As can be seen from the data reported in **Table S3**, the different Fe atoms have an appreciably different number of electrons in non-bonded orbitals, and this number has a rather large variability in the various  $E_4$  isomers.

All NBO calculations were performed using the NBO7 program (nbo7.chem.wisc.edu) on the truncated models reported in PNAS **2018**, *115*, E10521. These models were optimized at DFT/BP86 level using the Ahlrichs VTZ for all Fe atoms, the LANL2TZ basis set with an effective core potential for the Mo atom, the 6-311++G\*\* basis set for all atoms coordinated to metal atoms, including protic and hydridic hydrogen atoms and all of the atoms with which they interact via a covalent bond or a hydrogen bond, and finally the 6-31G\* basis set for all other atoms. The wavefunction of the lowest-energy broken symmetry state of each model was then recalculated using the 6-31G basis and employed as an input for the NBO code. All DFT calculation were performed with NWChem (*Comput Phys Commun* **2010**, *181*, 1477).

|                 | $E_4(4H)^{(a)}$ | $E_4(4H)^{(b)}$ | $E_4(4H)^{(c)}$ | $E_4(2H;H_2)$ | $E_4(2H)^*$ |
|-----------------|-----------------|-----------------|-----------------|---------------|-------------|
| Fe <sub>1</sub> | 0.6             | 0.7             | 0.5             | 0.6           | 0.6         |
| Fe <sub>2</sub> | 0.1             | -0.2            | -0.1            | -0.1          | -0.1        |
| Fe <sub>3</sub> | 0.1             | 0.1             | 0.1             | 0.0           | 0.0         |
| Fe <sub>4</sub> | -0.1            | -0.1            | 0.3             | 0.2           | 0.3         |
| Fe <sub>5</sub> | 0.6             | 0.6             | 0.6             | 0.6           | 0.6         |
| Fe <sub>6</sub> | 1.0             | 1.1             | 0.8             | 0.9           | 0.9         |
| Fe <sub>7</sub> | 0.5             | 0.4             | 0.1             | 0.2           | 0.3         |

**Table S1.** Mulliken charges ( $e$ ) of the Fe atoms of FeMo-co for different  $E_4$  isomers.

|                 | $E_4(4H)^{(a)}$ | $E_4(4H)^{(b)}$ | $E_4(4H)^{(c)}$ | $E_4(2H;H_2)$ | $E_4(2H)^*$ |
|-----------------|-----------------|-----------------|-----------------|---------------|-------------|
| Fe <sub>1</sub> | 1.1             | 1.1             | 1.1             | 1.1           | 1.1         |
| Fe <sub>2</sub> | 0.9             | 0.9             | 0.8             | 0.8           | 0.8         |
| Fe <sub>3</sub> | 1.0             | 0.9             | 0.8             | 0.9           | 0.9         |
| Fe <sub>4</sub> | 1.1             | 1.0             | 1.0             | 1.0           | 1.0         |
| Fe <sub>5</sub> | 1.0             | 1.0             | 1.1             | 1.0           | 1.0         |
| Fe <sub>6</sub> | 1.1             | 1.1             | 1.0             | 1.1           | 0.9         |
| Fe <sub>7</sub> | 0.8             | 0.8             | 0.8             | 0.8           | 0.8         |

**Table S2.** Natural charges ( $e$ ) of the Fe atoms of FeMo-co for different  $E_4$  isomers.

|                 | $E_4(4H)^{(a)}$ | $E_4(4H)^{(b)}$ | $E_4(4H)^{(c)}$ | $E_4(2H;H_2)$ | $E_4(2H)^*$ |
|-----------------|-----------------|-----------------|-----------------|---------------|-------------|
| Fe <sub>1</sub> | 4.8             | 5.0             | 5.0             | 5.1           | 5.0         |
| Fe <sub>2</sub> | 3.8             | 4.0             | 2.4             | 4.9           | 4.8         |
| Fe <sub>3</sub> | 4.4             | 3.5             | 2.8             | 3.8           | 4.3         |
| Fe <sub>4</sub> | 4.7             | 2.8             | 3.1             | 4.2           | 4.1         |
| Fe <sub>5</sub> | 3.4             | 4.1             | 4.5             | 4.4           | 3.9         |
| Fe <sub>6</sub> | 3.3             | 3.0             | 1.8             | 3.5           | 2.8         |
| Fe <sub>7</sub> | 1.7             | 2.5             | 1.3             | 2.9           | 3.3         |

**Table S3.** Total number of electron in non-bonded orbitals localized on the Fe atoms of FeMo-co for different  $E_4$  isomers.

## Coordinates of QM core of selected structures on the free energy surface reported in Figure 7

The coordinates of the QM region for representative structures discussed in Figure 7 as obtained from the QM/MM simulations are reported below. It is important to point out that these coordinates do not correspond to equilibrium structures on a potential energy surface but rather they belong to an ensemble of structures as obtained from non-equilibrium biased molecular dynamics. Nevertheless, the comparison between these non-equilibrium coordinates and the coordinates of the corresponding stationary points on the potential energy surface of the truncated models reported in PNAS 115, 2018, E10521 might provide useful insights for the interested reader. Please note that the QM/MM covalent boundary is marked by a bare C atom. The full QM/MM trajectories are available upon request.



## Structure A (close to E<sub>4</sub>(4H)<sup>(a)</sup>)

|   |        |        |        |
|---|--------|--------|--------|
| C | 11.168 | 9.709  | 19.152 |
| C | 12.651 | 10.192 | 18.900 |
| H | 13.130 | 10.244 | 19.942 |
| C | 13.439 | 9.254  | 17.935 |
| H | 14.496 | 9.333  | 18.141 |
| H | 13.041 | 8.141  | 18.056 |
| H | 13.301 | 9.658  | 16.943 |
| C | 12.632 | 11.690 | 18.376 |
| H | 12.073 | 12.323 | 19.069 |
| H | 13.628 | 12.054 | 18.186 |
| H | 11.984 | 11.685 | 17.430 |
| C | 6.004  | 10.988 | 16.885 |
| C | 7.439  | 11.047 | 17.341 |
| H | 7.786  | 12.047 | 17.430 |
| H | 7.454  | 10.519 | 18.320 |
| N | 8.378  | 10.371 | 16.393 |
| H | 8.767  | 11.022 | 15.756 |
| C | 8.943  | 9.176  | 16.577 |
| N | 8.320  | 8.143  | 17.255 |
| H | 7.685  | 8.395  | 17.970 |
| H | 8.908  | 7.380  | 17.563 |
| N | 10.006 | 8.918  | 15.809 |
| H | 10.445 | 9.669  | 15.216 |
| H | 10.388 | 7.990  | 15.737 |
| C | 18.620 | 10.199 | 19.349 |
| C | 18.682 | 10.791 | 17.960 |
| H | 19.414 | 11.624 | 17.934 |
| H | 19.189 | 10.023 | 17.376 |
| C | 17.450 | 11.438 | 17.326 |
| N | 17.018 | 11.018 | 16.044 |
| C | 16.048 | 11.840 | 15.593 |
| H | 15.497 | 11.830 | 14.613 |
| N | 15.766 | 12.680 | 16.549 |
| H | 14.913 | 13.331 | 16.524 |
| C | 16.502 | 12.451 | 17.658 |
| H | 16.282 | 12.903 | 18.567 |
| C | 15.896 | 6.340  | 9.812  |
| C | 15.026 | 6.962  | 10.868 |
| H | 14.899 | 6.183  | 11.674 |
| H | 14.009 | 7.022  | 10.465 |
| S | 15.581 | 8.608  | 11.501 |
| C | 17.757 | 7.877  | 15.167 |
| C | 16.120 | 7.494  | 15.225 |
| H | 15.820 | 7.045  | 16.148 |
| H | 15.663 | 8.525  | 15.176 |
| O | 15.772 | 6.720  | 14.109 |
| H | 15.634 | 7.295  | 13.289 |
| C | 12.696 | 19.179 | 9.012  |
| N | 12.565 | 17.788 | 9.810  |
| H | 11.606 | 17.780 | 10.077 |
| C | 13.484 | 17.743 | 11.008 |
| H | 13.544 | 18.751 | 11.402 |
| H | 13.094 | 17.027 | 11.707 |
| C | 14.870 | 17.227 | 10.690 |
| O | 15.917 | 17.917 | 10.868 |
| N | 14.887 | 15.881 | 10.387 |
| H | 13.922 | 15.431 | 10.476 |
| C | 15.954 | 14.977 | 10.728 |
| H | 16.926 | 15.500 | 10.840 |
| H | 15.642 | 14.463 | 11.648 |
| C | 16.266 | 13.857 | 9.705  |
| O | 17.449 | 13.485 | 9.570  |
| N | 15.185 | 13.439 | 9.017  |
| H | 14.322 | 13.736 | 9.453  |
| C | 15.159 | 12.302 | 8.120  |
| H | 16.152 | 12.164 | 7.657  |
| C | 14.917 | 10.917 | 8.667  |

|    |        |        |        |
|----|--------|--------|--------|
| C  | 14.167 | 12.546 | 6.930  |
| O  | 14.676 | 12.635 | 5.790  |
| N  | 12.870 | 12.807 | 7.208  |
| H  | 12.498 | 12.846 | 8.185  |
| C  | 11.916 | 13.155 | 6.269  |
| H  | 11.625 | 12.397 | 5.592  |
| C  | 10.637 | 13.754 | 6.972  |
| C  | 9.143  | 12.498 | 7.392  |
| C  | 9.490  | 11.643 | 8.649  |
| H  | 10.613 | 11.580 | 8.862  |
| H  | 9.090  | 12.181 | 9.531  |
| N  | 9.039  | 10.287 | 8.501  |
| H  | 9.746  | 9.578  | 8.219  |
| C  | 7.807  | 9.852  | 8.697  |
| N  | 6.838  | 10.537 | 9.282  |
| H  | 7.051  | 11.529 | 9.550  |
| H  | 5.960  | 10.484 | 8.796  |
| N  | 7.595  | 8.577  | 8.336  |
| H  | 8.202  | 8.102  | 7.726  |
| H  | 6.723  | 8.088  | 8.508  |
| C  | 12.633 | 14.362 | 5.058  |
| C  | 6.273  | 15.493 | 10.396 |
| C  | 6.448  | 16.309 | 11.734 |
| H  | 5.586  | 16.925 | 11.980 |
| H  | 6.657  | 15.540 | 12.539 |
| C  | 7.723  | 17.128 | 11.851 |
| N  | 8.816  | 16.852 | 12.647 |
| C  | 9.650  | 17.864 | 12.584 |
| H  | 10.578 | 17.967 | 13.047 |
| N  | 9.158  | 18.782 | 11.727 |
| H  | 9.573  | 19.758 | 11.624 |
| C  | 7.949  | 18.399 | 11.332 |
| H  | 7.276  | 18.897 | 10.673 |
| Fe | 13.542 | 9.704  | 11.853 |
| Mo | 9.490  | 15.012 | 13.953 |
| Fe | 13.047 | 11.502 | 13.674 |
| Fe | 11.156 | 10.429 | 12.653 |
| Fe | 12.583 | 12.032 | 11.243 |
| Fe | 11.112 | 14.081 | 12.104 |
| Fe | 11.998 | 13.690 | 14.553 |
| Fe | 9.749  | 12.276 | 13.422 |
| C  | 11.617 | 12.480 | 12.978 |
| S  | 14.669 | 11.750 | 12.211 |
| S  | 11.737 | 15.671 | 13.448 |
| S  | 12.515 | 9.303  | 13.883 |
| S  | 13.166 | 14.309 | 16.432 |
| S  | 11.911 | 13.834 | 10.043 |
| S  | 9.837  | 13.113 | 15.450 |
| S  | 11.783 | 9.938  | 10.494 |
| S  | 8.838  | 13.825 | 12.120 |
| S  | 8.819  | 10.450 | 12.218 |
| C  | 8.232  | 16.216 | 18.962 |
| C  | 9.130  | 16.427 | 17.529 |
| H  | 9.697  | 17.300 | 17.667 |
| H  | 9.894  | 15.639 | 17.409 |
| C  | 8.422  | 16.596 | 16.175 |
| C  | 7.354  | 15.562 | 15.974 |
| O  | 7.472  | 14.958 | 14.768 |
| O  | 6.482  | 15.253 | 16.802 |
| O  | 9.410  | 16.539 | 15.245 |
| C  | 7.625  | 18.002 | 16.120 |
| H  | 6.794  | 18.003 | 16.795 |
| H  | 8.361  | 18.770 | 16.370 |
| C  | 7.036  | 18.355 | 14.816 |
| H  | 12.995 | 12.322 | 15.017 |
| H  | 10.300 | 10.928 | 14.038 |
| H  | 13.533 | 15.615 | 16.127 |
| H  | 8.304  | 9.667  | 13.230 |
| O  | 6.946  | 6.133  | 10.239 |
| H  | 6.440  | 6.300  | 9.331  |

|   |        |        |        |
|---|--------|--------|--------|
| H | 7.388  | 5.242  | 10.098 |
| O | 6.155  | 12.923 | 13.581 |
| H | 6.935  | 12.539 | 13.092 |
| H | 6.639  | 13.517 | 14.200 |
| O | 9.513  | 7.414  | 11.268 |
| H | 8.650  | 7.176  | 10.898 |
| H | 9.423  | 8.345  | 11.523 |
| O | 10.906 | 8.387  | 7.529  |
| H | 10.397 | 7.659  | 7.003  |
| H | 11.370 | 7.926  | 8.305  |
| O | 11.518 | 6.369  | 9.628  |
| H | 10.836 | 6.777  | 10.258 |
| H | 12.155 | 5.850  | 10.199 |
| H | 17.543 | 10.426 | 15.441 |

## Transition state from A to B

|   |        |        |        |
|---|--------|--------|--------|
| C | 11.026 | 9.991  | 19.566 |
| C | 12.410 | 10.678 | 19.191 |
| H | 13.139 | 10.591 | 19.966 |
| C | 12.877 | 9.874  | 17.888 |
| H | 13.905 | 10.208 | 17.575 |
| H | 12.937 | 8.811  | 18.012 |
| H | 12.134 | 10.026 | 17.125 |
| C | 12.319 | 12.140 | 18.858 |
| H | 11.816 | 12.741 | 19.631 |
| H | 13.287 | 12.666 | 18.691 |
| H | 11.786 | 12.342 | 17.907 |
| C | 5.978  | 11.138 | 17.497 |
| C | 7.389  | 11.595 | 17.510 |
| H | 7.503  | 12.643 | 17.284 |
| H | 7.788  | 11.371 | 18.496 |
| N | 8.234  | 10.954 | 16.549 |
| H | 8.732  | 11.552 | 15.899 |
| C | 8.744  | 9.740  | 16.693 |
| N | 8.280  | 8.813  | 17.560 |
| H | 7.817  | 9.187  | 18.428 |
| H | 9.031  | 8.222  | 17.865 |
| N | 9.835  | 9.385  | 15.984 |
| H | 10.233 | 9.983  | 15.221 |
| H | 10.132 | 8.416  | 15.868 |
| C | 18.630 | 10.602 | 19.703 |
| C | 18.625 | 10.922 | 18.124 |
| H | 19.378 | 11.647 | 17.846 |
| H | 18.855 | 9.929  | 17.670 |
| C | 17.330 | 11.464 | 17.483 |
| N | 17.079 | 11.250 | 16.174 |
| C | 15.942 | 11.915 | 15.781 |
| H | 15.439 | 11.827 | 14.824 |
| N | 15.483 | 12.519 | 16.857 |
| H | 14.534 | 12.933 | 16.855 |
| C | 16.332 | 12.320 | 17.993 |
| H | 15.970 | 12.682 | 18.998 |
| C | 15.860 | 6.232  | 10.016 |
| C | 14.892 | 6.723  | 11.075 |
| H | 14.967 | 6.121  | 11.993 |
| H | 13.844 | 6.679  | 10.665 |
| S | 15.486 | 8.552  | 11.452 |
| C | 17.752 | 7.863  | 15.208 |
| C | 16.244 | 7.396  | 15.365 |
| H | 16.248 | 6.819  | 16.339 |
| H | 15.691 | 8.341  | 15.469 |
| O | 15.744 | 6.665  | 14.194 |
| H | 15.722 | 7.311  | 13.429 |
| C | 12.813 | 19.333 | 9.299  |
| N | 12.663 | 18.013 | 10.037 |
| H | 11.695 | 17.859 | 10.265 |
| C | 13.504 | 17.779 | 11.156 |
| H | 13.633 | 18.703 | 11.756 |
| H | 12.923 | 17.043 | 11.664 |
| C | 14.939 | 17.291 | 10.840 |
| O | 15.842 | 18.120 | 10.699 |
| N | 15.119 | 15.953 | 10.724 |
| H | 14.295 | 15.344 | 11.044 |
| C | 16.435 | 15.291 | 10.756 |
| H | 17.137 | 16.066 | 10.431 |
| H | 16.701 | 14.960 | 11.719 |
| C | 16.511 | 14.174 | 9.824  |
| O | 17.658 | 13.794 | 9.516  |
| N | 15.407 | 13.654 | 9.293  |
| H | 14.501 | 14.034 | 9.645  |
| C | 15.434 | 12.635 | 8.304  |
| H | 16.458 | 12.445 | 8.007  |
| C | 14.990 | 11.171 | 8.759  |

|    |        |        |        |
|----|--------|--------|--------|
| C  | 14.608 | 13.091 | 7.081  |
| O  | 15.026 | 13.066 | 5.865  |
| N  | 13.305 | 13.354 | 7.335  |
| H  | 12.911 | 13.544 | 8.293  |
| C  | 12.362 | 13.676 | 6.275  |
| H  | 12.009 | 12.736 | 5.728  |
| C  | 11.135 | 14.419 | 6.774  |
| C  | 9.470  | 13.443 | 8.254  |
| C  | 9.834  | 12.233 | 8.972  |
| H  | 10.863 | 11.987 | 8.660  |
| H  | 9.819  | 12.399 | 10.035 |
| N  | 9.143  | 10.956 | 8.672  |
| H  | 9.648  | 10.268 | 8.168  |
| C  | 7.956  | 10.618 | 9.141  |
| N  | 7.079  | 11.521 | 9.609  |
| H  | 7.394  | 12.426 | 9.926  |
| H  | 6.087  | 11.296 | 9.729  |
| N  | 7.606  | 9.300  | 8.963  |
| H  | 8.187  | 8.668  | 8.415  |
| H  | 6.686  | 8.921  | 8.885  |
| C  | 13.085 | 14.584 | 5.034  |
| C  | 6.152  | 15.535 | 10.840 |
| C  | 6.546  | 16.283 | 12.069 |
| H  | 5.622  | 16.887 | 12.365 |
| H  | 6.719  | 15.560 | 12.862 |
| C  | 7.758  | 17.178 | 11.963 |
| N  | 8.957  | 16.995 | 12.636 |
| C  | 9.662  | 18.158 | 12.528 |
| H  | 10.578 | 18.318 | 12.993 |
| N  | 8.994  | 18.992 | 11.727 |
| H  | 9.287  | 19.984 | 11.639 |
| C  | 7.807  | 18.451 | 11.341 |
| H  | 7.095  | 19.095 | 10.818 |
| Fe | 13.742 | 9.846  | 12.172 |
| Mo | 9.555  | 15.261 | 14.098 |
| Fe | 12.760 | 11.616 | 13.861 |
| Fe | 11.163 | 10.465 | 12.427 |
| Fe | 12.812 | 12.250 | 11.484 |
| Fe | 11.186 | 14.327 | 12.009 |
| Fe | 11.988 | 13.922 | 14.742 |
| Fe | 10.115 | 12.668 | 13.570 |
| C  | 11.906 | 12.918 | 12.966 |
| S  | 14.630 | 11.943 | 12.756 |
| S  | 11.728 | 15.813 | 13.497 |
| S  | 12.420 | 9.368  | 13.950 |
| S  | 13.130 | 14.655 | 16.570 |
| S  | 12.377 | 14.086 | 10.135 |
| S  | 9.965  | 13.491 | 15.661 |
| S  | 12.128 | 10.248 | 10.513 |
| S  | 8.940  | 13.963 | 12.192 |
| S  | 8.996  | 10.918 | 12.721 |
| C  | 7.595  | 16.479 | 18.988 |
| C  | 8.751  | 16.623 | 17.753 |
| H  | 9.377  | 17.501 | 17.946 |
| H  | 9.314  | 15.703 | 17.813 |
| C  | 8.186  | 16.798 | 16.307 |
| C  | 7.241  | 15.717 | 15.883 |
| O  | 7.541  | 15.113 | 14.758 |
| O  | 6.276  | 15.287 | 16.539 |
| O  | 9.276  | 16.713 | 15.435 |
| C  | 7.414  | 18.173 | 16.224 |
| H  | 6.572  | 18.152 | 16.941 |
| H  | 8.016  | 18.969 | 16.687 |
| C  | 6.915  | 18.562 | 14.860 |
| H  | 13.371 | 11.793 | 15.251 |
| H  | 11.324 | 11.755 | 14.680 |
| H  | 13.990 | 15.510 | 16.051 |
| H  | 8.936  | 9.805  | 13.567 |
| O  | 7.467  | 5.979  | 10.602 |
| H  | 7.027  | 6.297  | 9.768  |

|   |        |        |        |
|---|--------|--------|--------|
| H | 7.704  | 5.016  | 10.328 |
| O | 6.569  | 12.450 | 14.587 |
| H | 7.306  | 12.102 | 14.061 |
| H | 6.873  | 13.364 | 14.797 |
| O | 9.658  | 7.283  | 11.602 |
| H | 8.797  | 7.094  | 11.188 |
| H | 9.800  | 8.246  | 11.696 |
| O | 10.407 | 8.855  | 7.826  |
| H | 9.877  | 8.213  | 7.224  |
| H | 10.960 | 8.223  | 8.431  |
| O | 11.614 | 6.593  | 9.349  |
| H | 11.276 | 6.703  | 10.313 |
| H | 12.547 | 6.359  | 9.521  |
| H | 17.749 | 10.746 | 15.568 |

## Structure B (close to E<sub>4</sub>(4H)<sup>(b)</sup>)

|   |        |        |        |
|---|--------|--------|--------|
| C | 11.226 | 10.119 | 19.309 |
| C | 12.666 | 10.641 | 18.994 |
| H | 13.156 | 10.592 | 20.000 |
| C | 13.348 | 9.795  | 18.015 |
| H | 14.394 | 10.086 | 18.001 |
| H | 13.317 | 8.730  | 18.292 |
| H | 13.015 | 9.891  | 16.971 |
| C | 12.656 | 12.125 | 18.475 |
| H | 12.366 | 12.841 | 19.218 |
| H | 13.606 | 12.372 | 18.034 |
| H | 11.896 | 12.214 | 17.641 |
| C | 5.989  | 11.185 | 17.273 |
| C | 7.471  | 11.492 | 17.391 |
| H | 7.540  | 12.478 | 16.950 |
| H | 7.801  | 11.591 | 18.416 |
| N | 8.437  | 10.652 | 16.630 |
| H | 8.975  | 11.230 | 15.887 |
| C | 8.979  | 9.479  | 16.967 |
| N | 8.424  | 8.751  | 17.948 |
| H | 7.651  | 9.026  | 18.512 |
| H | 8.908  | 7.937  | 18.353 |
| N | 10.001 | 8.906  | 16.236 |
| H | 10.601 | 9.455  | 15.567 |
| H | 10.585 | 8.282  | 16.766 |
| C | 18.526 | 10.375 | 19.706 |
| C | 18.692 | 10.801 | 18.243 |
| H | 19.669 | 11.287 | 18.081 |
| H | 18.780 | 9.862  | 17.543 |
| C | 17.559 | 11.557 | 17.594 |
| N | 17.514 | 11.581 | 16.243 |
| C | 16.495 | 12.448 | 15.899 |
| H | 16.097 | 12.522 | 14.918 |
| N | 15.890 | 12.885 | 16.998 |
| H | 14.987 | 13.535 | 16.978 |
| C | 16.561 | 12.372 | 18.035 |
| H | 16.364 | 12.542 | 19.051 |
| C | 15.783 | 6.225  | 9.964  |
| C | 14.766 | 6.775  | 10.960 |
| H | 14.577 | 6.052  | 11.769 |
| H | 13.897 | 7.077  | 10.375 |
| S | 15.423 | 8.436  | 11.612 |
| C | 17.484 | 7.901  | 15.249 |
| C | 15.888 | 7.364  | 15.221 |
| H | 15.628 | 6.751  | 16.096 |
| H | 15.323 | 8.286  | 15.270 |
| O | 15.505 | 6.566  | 14.169 |
| H | 15.377 | 7.254  | 13.403 |
| C | 12.731 | 19.313 | 9.004  |
| N | 12.861 | 17.861 | 9.713  |
| H | 11.926 | 17.460 | 9.688  |
| C | 13.624 | 17.830 | 10.915 |
| H | 13.711 | 18.754 | 11.437 |
| H | 13.057 | 17.223 | 11.662 |
| C | 15.035 | 17.306 | 10.817 |
| O | 15.977 | 18.078 | 10.984 |
| N | 15.201 | 15.987 | 10.555 |
| H | 14.302 | 15.435 | 10.664 |
| C | 16.427 | 15.247 | 10.748 |
| H | 17.255 | 15.934 | 10.589 |
| H | 16.563 | 14.793 | 11.791 |
| C | 16.652 | 14.041 | 9.818  |
| O | 17.802 | 13.610 | 9.549  |
| N | 15.515 | 13.446 | 9.328  |
| H | 14.607 | 13.646 | 9.817  |
| C | 15.458 | 12.504 | 8.238  |
| H | 16.498 | 12.526 | 7.874  |
| C | 14.962 | 11.086 | 8.651  |

|    |        |        |        |
|----|--------|--------|--------|
| C  | 14.612 | 13.001 | 7.017  |
| O  | 15.104 | 13.205 | 5.888  |
| N  | 13.295 | 13.222 | 7.299  |
| H  | 13.037 | 13.140 | 8.317  |
| C  | 12.298 | 13.630 | 6.344  |
| H  | 11.788 | 12.770 | 5.897  |
| C  | 11.266 | 14.578 | 6.992  |
| C  | 9.425  | 12.706 | 7.410  |
| C  | 9.472  | 12.298 | 8.910  |
| H  | 10.500 | 12.197 | 9.140  |
| H  | 9.172  | 13.136 | 9.595  |
| N  | 8.860  | 11.039 | 9.061  |
| H  | 9.427  | 10.163 | 9.026  |
| C  | 7.563  | 10.858 | 9.386  |
| N  | 6.711  | 11.907 | 9.388  |
| H  | 7.023  | 12.846 | 9.111  |
| H  | 5.747  | 11.842 | 9.779  |
| N  | 7.137  | 9.566  | 9.648  |
| H  | 7.840  | 8.837  | 9.465  |
| H  | 6.236  | 9.462  | 9.119  |
| C  | 13.035 | 14.428 | 5.000  |
| C  | 5.677  | 15.106 | 11.100 |
| C  | 6.088  | 16.081 | 12.228 |
| H  | 5.331  | 16.753 | 12.664 |
| H  | 6.276  | 15.491 | 13.137 |
| C  | 7.283  | 16.987 | 12.025 |
| N  | 8.493  | 16.862 | 12.717 |
| C  | 9.177  | 17.975 | 12.397 |
| H  | 10.112 | 18.247 | 12.764 |
| N  | 8.415  | 18.810 | 11.660 |
| H  | 8.766  | 19.700 | 11.205 |
| C  | 7.243  | 18.170 | 11.328 |
| H  | 6.431  | 18.766 | 10.877 |
| Fe | 13.720 | 9.732  | 12.050 |
| Mo | 9.442  | 15.032 | 14.114 |
| Fe | 13.350 | 11.700 | 13.852 |
| Fe | 11.281 | 10.490 | 12.616 |
| Fe | 12.664 | 12.223 | 11.342 |
| Fe | 11.132 | 14.142 | 12.048 |
| Fe | 11.977 | 13.800 | 14.740 |
| Fe | 10.006 | 12.345 | 13.529 |
| C  | 11.734 | 12.612 | 13.059 |
| S  | 14.791 | 11.841 | 12.208 |
| S  | 11.635 | 15.809 | 13.705 |
| S  | 12.699 | 9.605  | 14.067 |
| S  | 13.331 | 14.606 | 16.579 |
| S  | 12.416 | 14.165 | 10.159 |
| S  | 9.998  | 13.308 | 15.597 |
| S  | 12.036 | 10.197 | 10.537 |
| S  | 8.959  | 13.762 | 12.240 |
| S  | 9.123  | 10.443 | 12.881 |
| C  | 7.483  | 16.182 | 18.927 |
| C  | 8.557  | 16.352 | 17.712 |
| H  | 9.142  | 17.241 | 17.898 |
| H  | 9.240  | 15.515 | 17.716 |
| C  | 7.958  | 16.597 | 16.341 |
| C  | 7.034  | 15.376 | 15.866 |
| O  | 7.450  | 14.650 | 14.842 |
| O  | 5.862  | 15.292 | 16.267 |
| O  | 9.143  | 16.512 | 15.390 |
| C  | 7.188  | 17.986 | 16.233 |
| H  | 6.537  | 18.026 | 17.141 |
| H  | 7.943  | 18.746 | 16.336 |
| C  | 6.359  | 18.410 | 14.978 |
| H  | 13.345 | 12.952 | 14.757 |
| H  | 14.186 | 11.310 | 15.151 |
| H  | 13.983 | 15.725 | 16.098 |
| H  | 9.185  | 9.503  | 13.880 |
| O  | 7.031  | 6.244  | 10.466 |
| H  | 6.622  | 6.515  | 9.606  |



|   |        |        |        |
|---|--------|--------|--------|
| H | 7.368  | 5.300  | 10.212 |
| O | 6.140  | 12.583 | 13.823 |
| H | 6.901  | 12.233 | 13.402 |
| H | 6.527  | 13.305 | 14.373 |
| O | 9.872  | 7.147  | 11.464 |
| H | 8.930  | 7.106  | 11.246 |
| H | 10.012 | 8.098  | 11.765 |
| O | 10.149 | 8.703  | 8.483  |
| H | 9.769  | 7.931  | 8.013  |
| H | 10.896 | 8.400  | 9.004  |
| O | 11.576 | 6.187  | 9.784  |
| H | 10.893 | 6.475  | 10.422 |
| H | 12.183 | 5.538  | 10.255 |
| H | 18.053 | 11.043 | 15.598 |

### Structure C (close to E<sub>4</sub>(4H)<sup>(c)</sup>)

|   |        |        |        |
|---|--------|--------|--------|
| C | 11.292 | 10.094 | 19.171 |
| C | 12.661 | 10.791 | 18.958 |
| H | 13.058 | 10.667 | 20.014 |
| C | 13.601 | 10.036 | 17.893 |
| H | 14.639 | 10.379 | 18.106 |
| H | 13.669 | 8.917  | 18.007 |
| H | 13.258 | 10.326 | 16.880 |
| C | 12.551 | 12.233 | 18.537 |
| H | 12.003 | 12.924 | 19.198 |
| H | 13.546 | 12.683 | 18.368 |
| H | 12.019 | 12.233 | 17.562 |
| C | 6.173  | 11.299 | 17.119 |
| C | 7.626  | 11.543 | 17.288 |
| H | 7.798  | 12.583 | 17.167 |
| H | 7.870  | 11.351 | 18.332 |
| N | 8.456  | 10.827 | 16.328 |
| H | 9.126  | 11.360 | 15.769 |
| C | 8.889  | 9.600  | 16.571 |
| N | 8.352  | 8.839  | 17.592 |
| H | 8.093  | 9.318  | 18.424 |
| H | 9.112  | 8.199  | 17.871 |
| N | 9.887  | 9.056  | 15.887 |
| H | 10.325 | 9.625  | 15.167 |
| H | 10.508 | 8.321  | 16.225 |
| C | 18.428 | 10.640 | 19.633 |
| C | 18.552 | 10.942 | 18.109 |
| H | 19.532 | 11.291 | 17.845 |
| H | 18.596 | 9.896  | 17.605 |
| C | 17.521 | 11.694 | 17.425 |
| N | 17.274 | 11.624 | 16.048 |
| C | 16.155 | 12.254 | 15.657 |
| H | 15.766 | 12.302 | 14.614 |
| N | 15.715 | 12.872 | 16.754 |
| H | 14.778 | 13.404 | 16.774 |
| C | 16.479 | 12.434 | 17.892 |
| H | 16.298 | 12.954 | 18.827 |
| C | 15.781 | 6.432  | 9.585  |
| C | 14.795 | 6.936  | 10.591 |
| H | 14.890 | 6.148  | 11.386 |
| H | 13.757 | 6.880  | 10.102 |
| S | 15.352 | 8.501  | 11.217 |
| C | 17.564 | 7.920  | 15.023 |
| C | 16.006 | 7.548  | 15.069 |
| H | 15.759 | 7.072  | 16.139 |
| H | 15.614 | 8.557  | 15.063 |
| O | 15.547 | 6.726  | 14.067 |
| H | 15.234 | 7.185  | 13.217 |
| C | 12.805 | 19.609 | 9.140  |
| N | 12.915 | 18.220 | 9.725  |
| H | 11.948 | 17.930 | 9.968  |
| C | 13.720 | 18.033 | 10.940 |
| H | 13.830 | 18.840 | 11.577 |
| H | 13.108 | 17.387 | 11.494 |
| C | 15.131 | 17.523 | 10.828 |
| O | 16.129 | 18.206 | 10.902 |
| N | 15.267 | 16.106 | 10.816 |
| H | 14.412 | 15.548 | 10.840 |
| C | 16.550 | 15.368 | 10.824 |
| H | 17.404 | 16.010 | 10.955 |
| H | 16.600 | 14.659 | 11.754 |
| C | 16.710 | 14.230 | 9.757  |
| O | 17.838 | 13.718 | 9.514  |
| N | 15.578 | 13.956 | 9.096  |
| H | 14.659 | 14.127 | 9.600  |
| C | 15.530 | 12.885 | 8.099  |
| H | 16.593 | 12.767 | 7.819  |
| C | 15.167 | 11.522 | 8.620  |

|    |        |        |        |
|----|--------|--------|--------|
| C  | 14.593 | 13.219 | 6.934  |
| O  | 14.934 | 13.115 | 5.738  |
| N  | 13.304 | 13.412 | 7.278  |
| H  | 13.038 | 13.592 | 8.256  |
| C  | 12.328 | 13.743 | 6.349  |
| H  | 11.855 | 12.984 | 5.743  |
| C  | 11.137 | 14.516 | 6.950  |
| C  | 9.404  | 13.248 | 7.911  |
| C  | 9.954  | 11.992 | 8.603  |
| H  | 10.931 | 11.803 | 8.034  |
| H  | 10.274 | 12.341 | 9.642  |
| N  | 9.057  | 10.908 | 8.497  |
| H  | 9.520  | 10.064 | 8.122  |
| C  | 7.846  | 10.832 | 9.154  |
| N  | 7.450  | 11.789 | 10.034 |
| H  | 8.004  | 12.643 | 10.143 |
| H  | 6.478  | 11.965 | 10.251 |
| N  | 7.176  | 9.676  | 8.991  |
| H  | 7.262  | 9.015  | 8.187  |
| H  | 6.287  | 9.488  | 9.497  |
| C  | 12.937 | 14.763 | 4.986  |
| C  | 6.073  | 15.292 | 10.769 |
| C  | 6.410  | 16.233 | 12.017 |
| H  | 5.468  | 16.789 | 12.349 |
| H  | 6.528  | 15.606 | 12.918 |
| C  | 7.618  | 17.114 | 11.912 |
| N  | 8.828  | 16.836 | 12.498 |
| C  | 9.547  | 17.960 | 12.370 |
| H  | 10.520 | 18.095 | 12.778 |
| N  | 8.948  | 18.894 | 11.655 |
| H  | 9.287  | 19.867 | 11.579 |
| C  | 7.667  | 18.414 | 11.307 |
| H  | 6.918  | 18.937 | 10.776 |
| Fe | 13.817 | 9.986  | 12.079 |
| Mo | 9.498  | 15.046 | 13.980 |
| Fe | 13.180 | 11.760 | 13.985 |
| Fe | 11.437 | 10.726 | 12.464 |
| Fe | 12.803 | 12.433 | 11.266 |
| Fe | 11.201 | 14.243 | 12.016 |
| Fe | 11.899 | 13.744 | 14.632 |
| Fe | 9.833  | 12.449 | 13.396 |
| C  | 11.665 | 12.518 | 12.910 |
| S  | 14.780 | 12.083 | 12.395 |
| S  | 11.673 | 15.795 | 13.537 |
| S  | 12.609 | 9.424  | 13.926 |
| S  | 13.146 | 14.784 | 16.745 |
| S  | 12.354 | 14.281 | 10.111 |
| S  | 9.956  | 13.245 | 15.477 |
| S  | 12.154 | 10.365 | 10.398 |
| S  | 8.917  | 13.979 | 11.942 |
| S  | 9.132  | 10.493 | 12.746 |
| C  | 7.344  | 15.907 | 18.863 |
| C  | 8.480  | 16.378 | 17.735 |
| H  | 9.021  | 17.278 | 18.025 |
| H  | 9.245  | 15.626 | 17.690 |
| C  | 8.062  | 16.497 | 16.229 |
| C  | 7.069  | 15.481 | 15.711 |
| O  | 7.492  | 14.788 | 14.652 |
| O  | 5.986  | 15.306 | 16.247 |
| O  | 9.271  | 16.513 | 15.363 |
| C  | 7.352  | 17.954 | 16.165 |
| H  | 6.507  | 18.016 | 16.854 |
| H  | 8.093  | 18.720 | 16.418 |
| C  | 6.837  | 18.295 | 14.770 |
| H  | 13.557 | 13.175 | 14.713 |
| H  | 12.319 | 12.328 | 15.308 |
| H  | 13.696 | 15.732 | 15.960 |
| H  | 8.890  | 9.559  | 13.621 |
| O  | 7.423  | 6.083  | 10.158 |
| H  | 6.852  | 6.229  | 9.322  |

|   |        |        |        |
|---|--------|--------|--------|
| H | 7.692  | 5.133  | 10.025 |
| O | 6.547  | 12.466 | 13.561 |
| H | 7.270  | 12.040 | 13.085 |
| H | 7.043  | 13.225 | 13.883 |
| O | 9.645  | 7.511  | 11.237 |
| H | 8.824  | 7.154  | 10.696 |
| H | 9.644  | 8.490  | 11.458 |
| O | 10.527 | 8.720  | 7.397  |
| H | 9.877  | 8.032  | 7.305  |
| H | 11.143 | 8.518  | 8.113  |
| O | 11.550 | 5.908  | 9.609  |
| H | 11.125 | 6.493  | 10.312 |
| H | 11.972 | 5.218  | 10.220 |
| H | 17.855 | 11.191 | 15.369 |

**Structure D (close to E<sub>4</sub>(2H; H<sub>2</sub>))**

|   |        |        |        |
|---|--------|--------|--------|
| C | 10.826 | 9.959  | 19.461 |
| C | 12.109 | 10.819 | 19.092 |
| H | 12.729 | 10.903 | 19.943 |
| C | 12.832 | 10.143 | 17.965 |
| H | 13.755 | 10.606 | 17.620 |
| H | 13.179 | 9.095  | 18.132 |
| H | 12.132 | 10.075 | 17.125 |
| C | 11.970 | 12.268 | 18.589 |
| H | 11.612 | 12.904 | 19.389 |
| H | 12.931 | 12.598 | 18.348 |
| H | 11.364 | 12.396 | 17.714 |
| C | 5.787  | 10.882 | 17.603 |
| C | 7.265  | 11.364 | 17.585 |
| H | 7.262  | 12.449 | 17.469 |
| H | 7.681  | 11.150 | 18.626 |
| N | 8.090  | 10.686 | 16.596 |
| H | 8.407  | 11.363 | 15.903 |
| C | 8.753  | 9.511  | 16.715 |
| N | 8.185  | 8.380  | 17.278 |
| H | 7.532  | 8.716  | 17.942 |
| H | 8.847  | 7.731  | 17.717 |
| N | 9.846  | 9.416  | 15.976 |
| H | 10.460 | 10.201 | 15.665 |
| H | 10.373 | 8.522  | 15.996 |
| C | 18.753 | 10.490 | 19.769 |
| C | 18.701 | 10.804 | 18.228 |
| H | 19.703 | 11.213 | 17.970 |
| H | 18.660 | 9.869  | 17.735 |
| C | 17.593 | 11.604 | 17.578 |
| N | 17.579 | 11.811 | 16.176 |
| C | 16.506 | 12.530 | 15.803 |
| H | 16.111 | 12.565 | 14.759 |
| N | 15.834 | 12.809 | 16.923 |
| H | 14.857 | 13.269 | 16.812 |
| C | 16.495 | 12.238 | 18.031 |
| H | 16.054 | 12.293 | 19.031 |
| C | 15.691 | 6.387  | 10.095 |
| C | 14.724 | 6.978  | 11.069 |
| H | 14.658 | 6.128  | 11.805 |
| H | 13.773 | 7.073  | 10.565 |
| S | 15.283 | 8.550  | 11.780 |
| C | 17.467 | 8.173  | 15.120 |
| C | 15.848 | 7.704  | 15.341 |
| H | 15.675 | 7.437  | 16.413 |
| H | 15.261 | 8.665  | 15.257 |
| O | 15.522 | 6.705  | 14.547 |
| H | 15.184 | 6.954  | 13.651 |
| C | 12.456 | 19.357 | 9.078  |
| N | 12.414 | 18.013 | 9.694  |
| H | 11.371 | 17.832 | 9.855  |
| C | 13.229 | 17.791 | 10.843 |
| H | 13.377 | 18.732 | 11.416 |
| H | 12.696 | 17.059 | 11.508 |
| C | 14.637 | 17.223 | 10.560 |
| O | 15.590 | 17.967 | 10.768 |
| N | 14.665 | 15.920 | 10.314 |
| H | 13.779 | 15.353 | 10.347 |
| C | 15.935 | 15.200 | 10.503 |
| H | 16.721 | 15.951 | 10.533 |
| H | 15.870 | 14.539 | 11.381 |
| C | 16.270 | 14.135 | 9.368  |
| O | 17.300 | 14.008 | 8.742  |
| N | 15.165 | 13.289 | 9.187  |
| H | 14.407 | 13.255 | 9.945  |
| C | 15.098 | 12.246 | 8.116  |
| H | 16.117 | 12.335 | 7.713  |
| C | 14.752 | 10.921 | 8.605  |

|    |        |        |        |
|----|--------|--------|--------|
| C  | 14.068 | 12.780 | 7.070  |
| O  | 14.376 | 12.943 | 5.887  |
| N  | 12.809 | 13.126 | 7.460  |
| H  | 12.601 | 13.469 | 8.410  |
| C  | 11.762 | 13.439 | 6.525  |
| H  | 11.298 | 12.572 | 6.084  |
| C  | 10.586 | 14.221 | 7.100  |
| C  | 8.964  | 12.394 | 7.757  |
| C  | 8.909  | 12.034 | 9.274  |
| H  | 9.812  | 12.355 | 9.844  |
| H  | 8.085  | 12.639 | 9.746  |
| N  | 8.757  | 10.591 | 9.393  |
| H  | 9.624  | 10.086 | 9.278  |
| C  | 7.573  | 9.985  | 9.144  |
| N  | 6.366  | 10.595 | 9.390  |
| H  | 6.179  | 11.530 | 9.769  |
| H  | 5.558  | 10.081 | 9.032  |
| N  | 7.623  | 8.741  | 8.650  |
| H  | 8.526  | 8.461  | 8.213  |
| H  | 6.833  | 8.099  | 8.697  |
| C  | 12.467 | 14.310 | 5.057  |
| C  | 6.332  | 15.310 | 10.769 |
| C  | 6.327  | 16.279 | 12.066 |
| H  | 5.297  | 16.857 | 12.163 |
| H  | 6.392  | 15.674 | 12.976 |
| C  | 7.565  | 17.092 | 12.008 |
| N  | 8.777  | 16.710 | 12.658 |
| C  | 9.552  | 17.792 | 12.599 |
| H  | 10.502 | 18.052 | 13.101 |
| N  | 8.882  | 18.781 | 11.999 |
| H  | 9.389  | 19.697 | 11.858 |
| C  | 7.664  | 18.341 | 11.544 |
| H  | 7.099  | 18.909 | 10.778 |
| Fe | 13.606 | 10.034 | 12.145 |
| Mo | 9.170  | 15.003 | 14.260 |
| Fe | 13.084 | 11.587 | 13.981 |
| Fe | 11.037 | 10.527 | 12.844 |
| Fe | 12.606 | 12.352 | 11.707 |
| Fe | 10.873 | 14.130 | 12.310 |
| Fe | 11.438 | 13.767 | 14.931 |
| Fe | 9.695  | 12.405 | 13.838 |
| C  | 11.421 | 12.525 | 13.336 |
| S  | 14.735 | 12.110 | 12.389 |
| S  | 11.346 | 15.753 | 13.741 |
| S  | 12.588 | 9.457  | 14.105 |
| S  | 13.039 | 14.620 | 16.607 |
| S  | 11.959 | 14.180 | 10.416 |
| S  | 9.547  | 13.363 | 15.934 |
| S  | 11.873 | 10.330 | 10.747 |
| S  | 8.808  | 13.630 | 12.277 |
| S  | 8.687  | 10.483 | 13.030 |
| C  | 6.741  | 15.563 | 18.977 |
| C  | 7.974  | 15.996 | 17.892 |
| H  | 8.502  | 16.833 | 18.321 |
| H  | 8.634  | 15.157 | 17.934 |
| C  | 7.575  | 16.245 | 16.486 |
| C  | 6.736  | 15.119 | 15.893 |
| O  | 7.183  | 14.605 | 14.715 |
| O  | 5.729  | 14.707 | 16.476 |
| O  | 8.690  | 16.453 | 15.584 |
| C  | 6.666  | 17.496 | 16.442 |
| H  | 5.684  | 17.156 | 16.812 |
| H  | 7.050  | 18.240 | 17.203 |
| C  | 6.345  | 18.088 | 15.129 |
| H  | 13.558 | 11.991 | 15.408 |
| H  | 12.682 | 11.483 | 15.516 |
| H  | 13.975 | 14.815 | 15.542 |
| H  | 8.634  | 9.496  | 13.978 |
| O  | 6.968  | 6.113  | 10.635 |
| H  | 6.574  | 6.485  | 9.831  |

|   |        |        |        |
|---|--------|--------|--------|
| H | 7.404  | 5.303  | 10.340 |
| O | 5.786  | 12.428 | 13.773 |
| H | 6.380  | 11.694 | 13.611 |
| H | 6.229  | 13.108 | 14.301 |
| O | 9.381  | 7.251  | 11.916 |
| H | 8.491  | 7.132  | 11.543 |
| H | 9.548  | 8.201  | 12.037 |
| O | 10.263 | 8.196  | 7.958  |
| H | 9.946  | 7.575  | 7.254  |
| H | 10.704 | 7.607  | 8.603  |
| O | 11.339 | 6.573  | 9.997  |
| H | 10.645 | 6.807  | 10.597 |
| H | 11.873 | 5.951  | 10.503 |
| H | 18.230 | 11.338 | 15.581 |

## Transition state from B to E

|   |        |        |        |
|---|--------|--------|--------|
| C | 10.425 | 10.211 | 19.213 |
| C | 11.526 | 11.310 | 19.000 |
| H | 12.091 | 11.524 | 19.964 |
| C | 12.578 | 10.786 | 18.004 |
| H | 13.391 | 11.533 | 17.845 |
| H | 13.113 | 9.869  | 18.306 |
| H | 12.158 | 10.557 | 17.036 |
| C | 10.870 | 12.601 | 18.443 |
| H | 10.298 | 13.067 | 19.277 |
| H | 11.502 | 13.413 | 18.086 |
| H | 10.303 | 12.373 | 17.522 |
| C | 5.809  | 11.122 | 17.279 |
| C | 7.284  | 11.505 | 17.200 |
| H | 7.367  | 12.553 | 16.922 |
| H | 7.683  | 11.341 | 18.182 |
| N | 7.957  | 10.688 | 16.170 |
| H | 8.199  | 11.257 | 15.364 |
| C | 8.496  | 9.485  | 16.345 |
| N | 8.082  | 8.684  | 17.338 |
| H | 7.623  | 9.138  | 18.120 |
| H | 8.699  | 7.976  | 17.736 |
| N | 9.531  | 9.125  | 15.575 |
| H | 10.030 | 9.869  | 14.969 |
| H | 10.075 | 8.264  | 15.715 |
| C | 18.654 | 10.605 | 19.542 |
| C | 18.706 | 10.928 | 17.994 |
| H | 19.657 | 11.360 | 17.777 |
| H | 18.640 | 9.951  | 17.439 |
| C | 17.570 | 11.715 | 17.459 |
| N | 17.441 | 11.743 | 16.040 |
| C | 16.232 | 12.282 | 15.708 |
| H | 15.902 | 12.433 | 14.624 |
| N | 15.668 | 12.654 | 16.859 |
| H | 14.696 | 13.100 | 16.764 |
| C | 16.425 | 12.267 | 17.912 |
| H | 16.053 | 12.411 | 18.917 |
| C | 15.813 | 6.473  | 10.000 |
| C | 14.774 | 7.057  | 10.895 |
| H | 14.634 | 6.392  | 11.833 |
| H | 13.798 | 7.308  | 10.372 |
| S | 15.432 | 8.659  | 11.531 |
| C | 17.581 | 8.193  | 15.173 |
| C | 16.047 | 7.807  | 15.322 |
| H | 15.994 | 7.084  | 16.168 |
| H | 15.520 | 8.718  | 15.717 |
| O | 15.397 | 7.172  | 14.225 |
| H | 15.250 | 7.828  | 13.498 |
| C | 12.377 | 19.314 | 8.950  |
| N | 12.472 | 17.772 | 9.492  |
| H | 11.469 | 17.576 | 9.585  |
| C | 13.149 | 17.787 | 10.825 |
| H | 13.101 | 18.778 | 11.316 |
| H | 12.703 | 16.969 | 11.475 |
| C | 14.609 | 17.471 | 10.594 |
| O | 15.517 | 18.294 | 10.418 |
| N | 14.871 | 16.104 | 10.703 |
| H | 14.052 | 15.491 | 10.749 |
| C | 16.157 | 15.587 | 10.502 |
| H | 16.837 | 16.489 | 10.209 |
| H | 16.462 | 15.137 | 11.498 |
| C | 16.317 | 14.475 | 9.478  |
| O | 17.436 | 14.185 | 9.000  |
| N | 15.148 | 13.837 | 9.175  |
| H | 14.275 | 13.876 | 9.819  |
| C | 15.163 | 12.822 | 8.100  |
| H | 16.111 | 12.795 | 7.603  |
| C | 15.059 | 11.430 | 8.781  |



|    |        |        |        |
|----|--------|--------|--------|
| C  | 14.174 | 13.128 | 6.996  |
| O  | 14.483 | 13.160 | 5.802  |
| N  | 12.894 | 13.322 | 7.335  |
| H  | 12.544 | 13.359 | 8.308  |
| C  | 11.851 | 13.586 | 6.450  |
| H  | 11.301 | 12.724 | 5.950  |
| C  | 10.513 | 14.192 | 7.181  |
| C  | 9.149  | 12.991 | 7.876  |
| C  | 9.682  | 11.884 | 8.816  |
| H  | 10.756 | 11.689 | 8.468  |
| H  | 9.706  | 12.237 | 9.825  |
| N  | 9.072  | 10.536 | 8.656  |
| H  | 9.724  | 9.814  | 8.216  |
| C  | 7.754  | 10.178 | 8.787  |
| N  | 7.017  | 11.045 | 9.575  |
| H  | 7.513  | 11.967 | 9.717  |
| H  | 6.109  | 11.328 | 9.221  |
| N  | 7.292  | 9.055  | 8.317  |
| H  | 7.901  | 8.432  | 7.703  |
| H  | 6.388  | 8.768  | 8.574  |
| C  | 12.404 | 14.491 | 5.036  |
| C  | 5.860  | 15.583 | 10.395 |
| C  | 6.161  | 16.407 | 11.620 |
| H  | 5.343  | 17.202 | 11.686 |
| H  | 6.067  | 15.793 | 12.542 |
| C  | 7.441  | 17.193 | 11.707 |
| N  | 8.599  | 16.753 | 12.414 |
| C  | 9.358  | 17.838 | 12.462 |
| H  | 10.321 | 17.907 | 12.904 |
| N  | 8.863  | 18.877 | 11.801 |
| H  | 9.283  | 19.832 | 12.034 |
| C  | 7.658  | 18.472 | 11.260 |
| H  | 7.042  | 19.085 | 10.680 |
| Fe | 13.651 | 9.962  | 12.035 |
| Mo | 9.068  | 15.067 | 13.812 |
| Fe | 12.650 | 11.594 | 13.826 |
| Fe | 11.117 | 10.457 | 12.272 |
| Fe | 12.546 | 12.292 | 11.243 |
| Fe | 10.831 | 14.281 | 11.995 |
| Fe | 11.446 | 13.643 | 14.511 |
| Fe | 9.454  | 12.376 | 13.276 |
| C  | 11.313 | 12.365 | 12.788 |
| S  | 14.488 | 12.177 | 12.465 |
| S  | 11.273 | 15.755 | 13.713 |
| S  | 12.288 | 9.370  | 13.786 |
| S  | 13.013 | 14.333 | 16.215 |
| S  | 12.096 | 14.256 | 10.177 |
| S  | 9.516  | 13.227 | 15.309 |
| S  | 12.119 | 10.137 | 10.349 |
| S  | 8.658  | 13.840 | 11.832 |
| S  | 8.878  | 10.240 | 12.515 |
| C  | 7.051  | 15.722 | 18.577 |
| C  | 8.101  | 15.830 | 17.362 |
| H  | 8.865  | 16.476 | 17.699 |
| H  | 8.601  | 14.941 | 17.152 |
| C  | 7.577  | 16.350 | 16.012 |
| C  | 6.578  | 15.351 | 15.370 |
| O  | 6.990  | 14.882 | 14.188 |
| O  | 5.581  | 14.856 | 15.963 |
| O  | 8.740  | 16.417 | 15.188 |
| C  | 6.942  | 17.710 | 16.120 |
| H  | 6.087  | 17.501 | 16.729 |
| H  | 7.619  | 18.384 | 16.628 |
| C  | 6.566  | 18.420 | 14.810 |
| H  | 13.534 | 12.174 | 15.359 |
| H  | 13.930 | 11.459 | 15.528 |
| H  | 13.869 | 15.026 | 15.364 |
| H  | 8.713  | 9.524  | 13.777 |
| O  | 7.020  | 6.214  | 10.281 |
| H  | 6.487  | 6.531  | 9.433  |

|   |        |        |        |
|---|--------|--------|--------|
| H | 7.159  | 5.168  | 10.076 |
| O | 6.013  | 12.422 | 13.517 |
| H | 6.524  | 12.087 | 12.771 |
| H | 6.379  | 13.349 | 13.601 |
| O | 9.696  | 6.895  | 11.271 |
| H | 8.722  | 6.716  | 11.049 |
| H | 9.824  | 7.863  | 11.498 |
| O | 10.625 | 8.542  | 6.961  |
| H | 10.007 | 7.749  | 6.865  |
| H | 11.342 | 8.330  | 7.604  |
| O | 11.572 | 6.110  | 9.326  |
| H | 10.958 | 6.421  | 10.062 |
| H | 12.193 | 5.405  | 9.810  |
| H | 18.067 | 11.259 | 15.421 |

## Structure E (Representative E<sub>4</sub>\*(2H) + H<sub>2</sub>)

|   |        |        |        |
|---|--------|--------|--------|
| C | 10.420 | 10.164 | 19.246 |
| C | 11.575 | 11.213 | 19.085 |
| H | 12.192 | 11.230 | 20.028 |
| C | 12.407 | 10.679 | 17.840 |
| H | 13.348 | 11.221 | 17.839 |
| H | 12.591 | 9.596  | 17.987 |
| H | 11.910 | 10.938 | 16.929 |
| C | 10.938 | 12.649 | 18.734 |
| H | 10.408 | 13.127 | 19.555 |
| H | 11.792 | 13.301 | 18.312 |
| H | 10.121 | 12.463 | 18.016 |
| C | 5.583  | 10.861 | 17.030 |
| C | 7.062  | 11.150 | 17.011 |
| H | 7.263  | 12.165 | 16.650 |
| H | 7.357  | 11.093 | 18.048 |
| N | 7.973  | 10.395 | 16.189 |
| H | 8.646  | 11.106 | 15.758 |
| C | 8.573  | 9.221  | 16.475 |
| N | 8.002  | 8.335  | 17.311 |
| H | 7.720  | 8.674  | 18.195 |
| H | 8.378  | 7.401  | 17.398 |
| N | 9.618  | 8.826  | 15.693 |
| H | 10.068 | 9.493  | 15.041 |
| H | 10.262 | 8.124  | 16.076 |
| C | 18.704 | 10.433 | 19.450 |
| C | 18.957 | 10.807 | 17.889 |
| H | 19.830 | 11.608 | 17.867 |
| H | 19.292 | 9.979  | 17.215 |
| C | 17.713 | 11.359 | 17.276 |
| N | 17.478 | 11.573 | 15.888 |
| C | 16.340 | 12.167 | 15.662 |
| H | 15.976 | 12.290 | 14.621 |
| N | 15.790 | 12.439 | 16.880 |
| H | 14.982 | 13.057 | 16.947 |
| C | 16.684 | 12.027 | 17.913 |
| H | 16.465 | 12.191 | 18.931 |
| C | 15.632 | 6.587  | 9.977  |
| C | 14.694 | 7.072  | 11.049 |
| H | 14.715 | 6.339  | 11.898 |
| H | 13.674 | 7.297  | 10.717 |
| S | 15.491 | 8.653  | 11.722 |
| C | 17.754 | 8.204  | 15.256 |
| C | 16.207 | 7.806  | 15.496 |
| H | 16.265 | 7.276  | 16.485 |
| H | 15.686 | 8.804  | 15.578 |
| O | 15.737 | 6.927  | 14.510 |
| H | 15.514 | 7.500  | 13.719 |
| C | 12.253 | 19.215 | 9.041  |
| N | 12.306 | 17.775 | 9.566  |
| H | 11.358 | 17.480 | 9.761  |
| C | 13.075 | 17.481 | 10.800 |
| H | 13.059 | 18.332 | 11.476 |
| H | 12.617 | 16.652 | 11.390 |
| C | 14.517 | 17.246 | 10.673 |
| O | 15.342 | 18.197 | 10.644 |
| N | 14.890 | 15.930 | 10.856 |
| H | 14.202 | 15.177 | 10.896 |
| C | 16.242 | 15.406 | 10.616 |
| H | 16.847 | 16.276 | 10.307 |
| H | 16.668 | 15.016 | 11.524 |
| C | 16.307 | 14.403 | 9.457  |
| O | 17.436 | 14.176 | 9.008  |
| N | 15.135 | 13.755 | 9.086  |
| H | 14.304 | 13.919 | 9.671  |
| C | 15.058 | 12.725 | 8.077  |
| H | 16.108 | 12.557 | 7.590  |
| C | 14.626 | 11.364 | 8.770  |

|    |        |        |        |
|----|--------|--------|--------|
| C  | 14.105 | 13.023 | 6.896  |
| O  | 14.401 | 12.872 | 5.678  |
| N  | 12.854 | 13.361 | 7.256  |
| H  | 12.588 | 13.612 | 8.314  |
| C  | 11.864 | 13.609 | 6.313  |
| H  | 11.423 | 12.734 | 5.773  |
| C  | 10.680 | 14.418 | 6.973  |
| C  | 9.411  | 12.880 | 7.516  |
| C  | 9.689  | 11.707 | 8.538  |
| H  | 10.741 | 11.401 | 8.585  |
| H  | 9.416  | 12.218 | 9.526  |
| N  | 9.021  | 10.419 | 8.247  |
| H  | 9.536  | 9.639  | 7.861  |
| C  | 7.792  | 10.088 | 8.720  |
| N  | 6.968  | 10.962 | 9.340  |
| H  | 7.209  | 11.917 | 9.421  |
| H  | 5.967  | 10.818 | 9.172  |
| N  | 7.333  | 8.829  | 8.447  |
| H  | 7.965  | 8.154  | 8.042  |
| H  | 6.351  | 8.485  | 8.603  |
| C  | 12.610 | 14.402 | 4.972  |
| C  | 5.989  | 15.430 | 10.352 |
| C  | 6.127  | 16.286 | 11.746 |
| H  | 5.170  | 16.859 | 11.808 |
| H  | 6.170  | 15.739 | 12.638 |
| C  | 7.295  | 17.212 | 11.759 |
| N  | 8.462  | 16.947 | 12.425 |
| C  | 9.190  | 18.057 | 12.379 |
| H  | 10.242 | 18.248 | 12.786 |
| N  | 8.586  | 18.975 | 11.617 |
| H  | 8.834  | 19.990 | 11.560 |
| C  | 7.364  | 18.499 | 11.250 |
| H  | 6.678  | 19.180 | 10.732 |
| Fe | 13.595 | 9.812  | 12.128 |
| Mo | 9.174  | 14.931 | 13.731 |
| Fe | 12.698 | 11.550 | 13.717 |
| Fe | 10.963 | 10.425 | 12.341 |
| Fe | 12.682 | 12.097 | 11.357 |
| Fe | 10.928 | 14.058 | 12.058 |
| Fe | 11.513 | 13.662 | 14.402 |
| Fe | 9.401  | 12.227 | 13.176 |
| C  | 11.340 | 12.338 | 12.796 |
| S  | 14.711 | 11.955 | 12.543 |
| S  | 11.402 | 15.786 | 13.438 |
| S  | 12.233 | 9.401  | 13.875 |
| S  | 13.229 | 14.002 | 15.979 |
| S  | 12.261 | 13.973 | 10.217 |
| S  | 9.510  | 13.047 | 15.187 |
| S  | 12.017 | 9.968  | 10.420 |
| S  | 8.818  | 13.716 | 11.721 |
| S  | 8.750  | 10.160 | 12.342 |
| C  | 7.179  | 15.618 | 18.584 |
| C  | 8.309  | 16.026 | 17.379 |
| H  | 8.958  | 16.871 | 17.553 |
| H  | 8.913  | 15.156 | 17.273 |
| C  | 7.793  | 16.431 | 15.953 |
| C  | 6.786  | 15.363 | 15.442 |
| O  | 7.152  | 14.731 | 14.306 |
| O  | 5.773  | 15.042 | 16.095 |
| O  | 8.808  | 16.441 | 15.093 |
| C  | 6.936  | 17.753 | 16.144 |
| H  | 6.157  | 17.471 | 16.868 |
| H  | 7.609  | 18.447 | 16.703 |
| C  | 6.431  | 18.268 | 14.874 |
| H  | 14.018 | 11.670 | 15.201 |
| H  | 13.963 | 10.927 | 15.196 |
| H  | 13.878 | 14.899 | 15.257 |
| H  | 8.384  | 9.137  | 13.227 |
| O  | 6.938  | 5.896  | 10.438 |
| H  | 6.460  | 6.228  | 9.616  |

|   |        |        |        |
|---|--------|--------|--------|
| H | 7.269  | 5.010  | 10.083 |
| O | 6.180  | 12.096 | 13.845 |
| H | 6.889  | 11.667 | 13.351 |
| H | 6.520  | 13.048 | 13.992 |
| O | 9.362  | 7.074  | 10.869 |
| H | 8.458  | 6.714  | 10.691 |
| H | 9.311  | 8.020  | 10.999 |
| O | 10.701 | 8.597  | 7.056  |
| H | 10.065 | 7.902  | 6.734  |
| H | 11.220 | 8.200  | 7.759  |
| O | 11.424 | 6.041  | 9.408  |
| H | 10.911 | 6.608  | 10.028 |
| H | 11.858 | 5.377  | 9.954  |
| H | 18.074 | 11.180 | 15.112 |
